# Supplementary material
Source: HighWire-hosted journal article supplement (https://bmjopen.bmj.com/content/7/3/e014609)
Supplement: inline-supplementary-material-1 [file inline-supplementary-material-1.pdf]

## PRISM-P checklist of items to be reported in a systematic review

| Domain                                       | Line item & PRISM-P code                           | Page   |
|----------------------------------------------|----------------------------------------------------|--------|
| <b>Section 1: Administrative information</b> |                                                    |        |
| 1. Title:                                    |                                                    |        |
|                                              | Identification [1a]                                | 1      |
|                                              | Update [1b]                                        | NA     |
| 2. Registration                              | Registration [2]                                   | 4      |
| 3. Authors:                                  |                                                    |        |
|                                              | Contact [3a]                                       | 1      |
|                                              | Contributions [3b]                                 | 21     |
| 4. Amendments                                | Amendments [4]                                     | 21     |
| 5. Support:                                  |                                                    |        |
|                                              | Sources [5a]                                       | 20-21  |
|                                              | Sponsor [5b]                                       | 21     |
|                                              | Role of sponsor or funder [5c]                     | 21     |
| <b>Section 2: Introduction</b>               |                                                    |        |
| 6. Rationale                                 | Rationale [6]                                      | 8      |
| 7. Objectives                                | Objectives [7]                                     | 8, 9   |
| <b>Section 3: Methods</b>                    |                                                    |        |
| 8. Eligibility                               | Eligibility criteria [8]                           | 10, 11 |
| 9. Information                               | Information sources [9]                            | 12     |
| 10. Search                                   | Search strategy [10]                               | 11     |
| 11. Study records:                           |                                                    |        |
|                                              | Data management [11a]                              | 13     |
|                                              | Selection process [11b]                            | 12     |
|                                              | Data collection process [11c]                      | 12, 13 |
| 12. Data                                     | Data items [12]                                    | 13     |
| 13. Outcomes                                 | Outcomes and prioritization [13]                   | 10     |
| 14. Bias                                     | Risk of bias in individual studies [14]            | 14-16  |
| 15. Data synthesis                           |                                                    |        |
|                                              | Quantitative synthesis criteria [15a]              | 17-18  |
|                                              | Appropriateness of data for synthesis [15b]        | 17-18  |
|                                              | Sensitivity and subgroup analyses [15c]            | 19     |
|                                              | Qualitative synthesis? [15d]                       | 17-18  |
| 16. Meta-bias(es)                            | Meta-bias(es) [16]                                 | 14     |
| 17. Confidence in cumulative evidence        | Assessment of strength of cumulative evidence [17] | 14     |

(PRISM-P=Preferred Reporting Items for Systematic Review-Protocol)
