# Supplementary material
Source: HighWire-hosted journal article supplement (https://bmjopen.bmj.com/content/7/3/e014609)
Supplement: inline-supplementary-material-2 [file inline-supplementary-material-2.pdf]

## Search strategy

| Item                | Search term                                                                                                                                                                                                                                                                                                                                                                                                                                                                                                                                                                                                                                                                                                                                                                                                                        | Boolean operator |
|---------------------|------------------------------------------------------------------------------------------------------------------------------------------------------------------------------------------------------------------------------------------------------------------------------------------------------------------------------------------------------------------------------------------------------------------------------------------------------------------------------------------------------------------------------------------------------------------------------------------------------------------------------------------------------------------------------------------------------------------------------------------------------------------------------------------------------------------------------------|------------------|
| <b>Adolescents</b>  | ("adolescent"[All Fields] OR "adolescence"[All Fields] OR "adolescent" [MeSH Terms] OR "adolescence" [MeSH Terms] OR "teen*" [All Fields] OR "child" [All Fields] OR "person" [All Fields] OR "persons" [MeSH Terms] OR "people" [All Fields])                                                                                                                                                                                                                                                                                                                                                                                                                                                                                                                                                                                     | AND              |
| <b>Tuberculosis</b> | ("tuberculosis"[All Fields] OR "tuberculosis"[MeSH Terms] OR "TB"[All Fields] OR "TB"[MeSH Terms] OR "LTBI"[MeSH Terms] OR "LTBI"[All Fields] OR "latent"[MeSH Terms] OR "latent"[All Fields])                                                                                                                                                                                                                                                                                                                                                                                                                                                                                                                                                                                                                                     | AND              |
| <b>Countries</b>    | ("Africa" [All Fields] OR "Africa" [MeSH Terms] OR "east*" [All Fields] OR "south*" [All Fields] OR "Congo" [All Fields] OR "Zaire" [All fields] OR "Ethiopia" [All Fields] OR "Kenya" [All Fields] OR "Uganda" [All Fields] OR "Tanzania" [All Fields] OR "Zimbabwe" [All Fields] OR "South Africa" [All Fields] OR "Mozambique" [All Fields] OR "Nigeria" [All Fields] OR "Angola" [All Fields] OR "Sierra Leone " [All Fields] OR ["Central" AND "African" AND "Republic"] [All Fields] OR "Lesotho " [All Fields] OR "Liberia " [All Fields] OR "Namibia " [All Fields] OR "Zambia " [All Fields] OR "Botswana " [All Fields] OR "Cameroon " [All Fields] OR "Chad" [All Fields] OR " Ghana " [All Fields] OR "Guinea-Bissau " [All Fields] OR "Malawi " [All Fields] OR "Swaziland " [All Fields] OR "Somalia" [All Fields] ) | AND              |
| <b>Prevalence</b>   | ("epidemiology"[Subheading] OR "epidemiology"[MeSH Terms] OR "epidemiology"[All Fields] OR "prevalence"[All Fields] OR "prevalence"[MeSH Terms])                                                                                                                                                                                                                                                                                                                                                                                                                                                                                                                                                                                                                                                                                   | AND              |
| <b>Time period</b>  | Between 1 <sup>st</sup> January 1990 and 1 <sup>st</sup> July 2016                                                                                                                                                                                                                                                                                                                                                                                                                                                                                                                                                                                                                                                                                                                                                                 |                  |

\*Covers both Democratic Republic of Congo and Congo
